# Supplementary material for: Growth mechanism of aromatic prebiotic molecules: insights from different processes of ion–molecule reactions in benzonitrile–ammonia and benzonitrile–methylamine clusters
Source: Royal Society of Chemistry journal article supplement (doi:10.1039/d4cp01603c), 2024-01-01
Supplement: d4cp01603c1.pdf [file d4cp01603c1.pdf]

**Electronic supplementary information (ESI)**

**Growth mechanism of aromatic prebiotic molecules: insights from different processes of ion-molecule reactions in benzonitrile-ammonia and benzonitrile-methylamine clusters**

Xutao Chen,<sup>a</sup> Yujian Li,<sup>a</sup> Min Xie,<sup>\*a</sup> Yongjun Hu<sup>\*a</sup>

**AFFILIATIONS**

<sup>a</sup> MOE Key Laboratory of Laser Life Science & Guangdong Provincial Key Laboratory of Laser Life Science, Guangzhou Key Laboratory of Spectral Analysis and Functional Probes, College of Biophotonics, South China Normal University, Guangzhou 510631, China

**AUTHOR INFORMATION**

**\*Corresponding Author**

E-mail: xiemin@m.scnu.edu.cn (M.X.); yjhu@scnu.edu.cn (Y.J.H.)

Telephone: (+86-20)8521-1920 EXT 8713. Fax: (+86-20) 8521-6052.

## Table of Contents

**Fig. S1** The mass spectra of the BN-NH<sub>3</sub> clusters with IR laser off and on (250 ns after the VUV ionization)

**Fig. S2** (a) The observed spectrum of the (BN-NH<sub>3</sub>)<sup>+</sup> and (b-d) the computed spectra of C-N-I type structures.

**Fig. S3** (a) The observed spectrum of the (BN-NH<sub>3</sub>)<sup>+</sup> and (b-d) the computed spectra of N···HC type structures.

**Fig. S4** Energy diagram for the isomerization reaction of (BN-NH<sub>3</sub>)<sup>+</sup> after ionization from stable neutral *m*-BA and *p*-BA structures.

**Fig. S5** The potential energy diagram from the vertically ionized structure to the C-N-I type structure of the (BN-NH<sub>3</sub>)<sup>+</sup>.

**Fig. S6** The HOMO orbitals (isoval= 0.08) of BN-NH<sub>3</sub>.

**Fig. S7** The Mulliken charge distribution for the C-N-I type structure of the (BN-NH<sub>3</sub>)<sup>+</sup>.

**Fig. S8** (a) Isosurface map (Isovalue=1.0) of C-N-I(1) structure for (BN-NH<sub>3</sub>)<sup>+</sup> and (b) the coloring method for mapping the  $sign(\lambda_2)\rho$  onto the isosurface.

**Fig. S9** The mass spectra of the BN-MA clusters with IR laser off and on (250 ns after the VUV ionization)

**Fig. S10** Twenty three isomers of (BN-MA)<sup>+</sup> have been found and divided into five categories according to their structural characteristics.

**Fig. S11** (a) The other types of structures of (BN-MA)<sup>+</sup> and (b-f) the corresponding calculated spectra I.

**Fig. S12** (a) The other types of structures of (BN-MA)<sup>+</sup> and (b-f) the corresponding calculated spectra II.

**Fig. S13** Energy diagram for the isomerization reaction of (BN-MA)<sup>+</sup> after ionization from stable neutral *m*-BA and *p*-BA structures.

**Fig. S14** The potential energy diagram from the vertically ionized structure to the N···HN type structures of the (BN-MA)<sup>+</sup>.

**Fig. S15** The HOMO orbitals (isoval= 0.08) of BN-MA

**Fig. S16** The Mulliken charge distribution for the N···HN type structures of the (BN-MA)<sup>+</sup>.

**Table S1** Calculated harmonic vibrational wavenumbers and IR intensities of BN-NH<sub>3</sub>.

**Table S2** Mullikan charge in the BN moiety calculated for various (BN-NH<sub>3</sub>)<sup>+</sup>

**Table S3** Calculated harmonic vibrational wavenumbers and IR intensities of BN-MA.

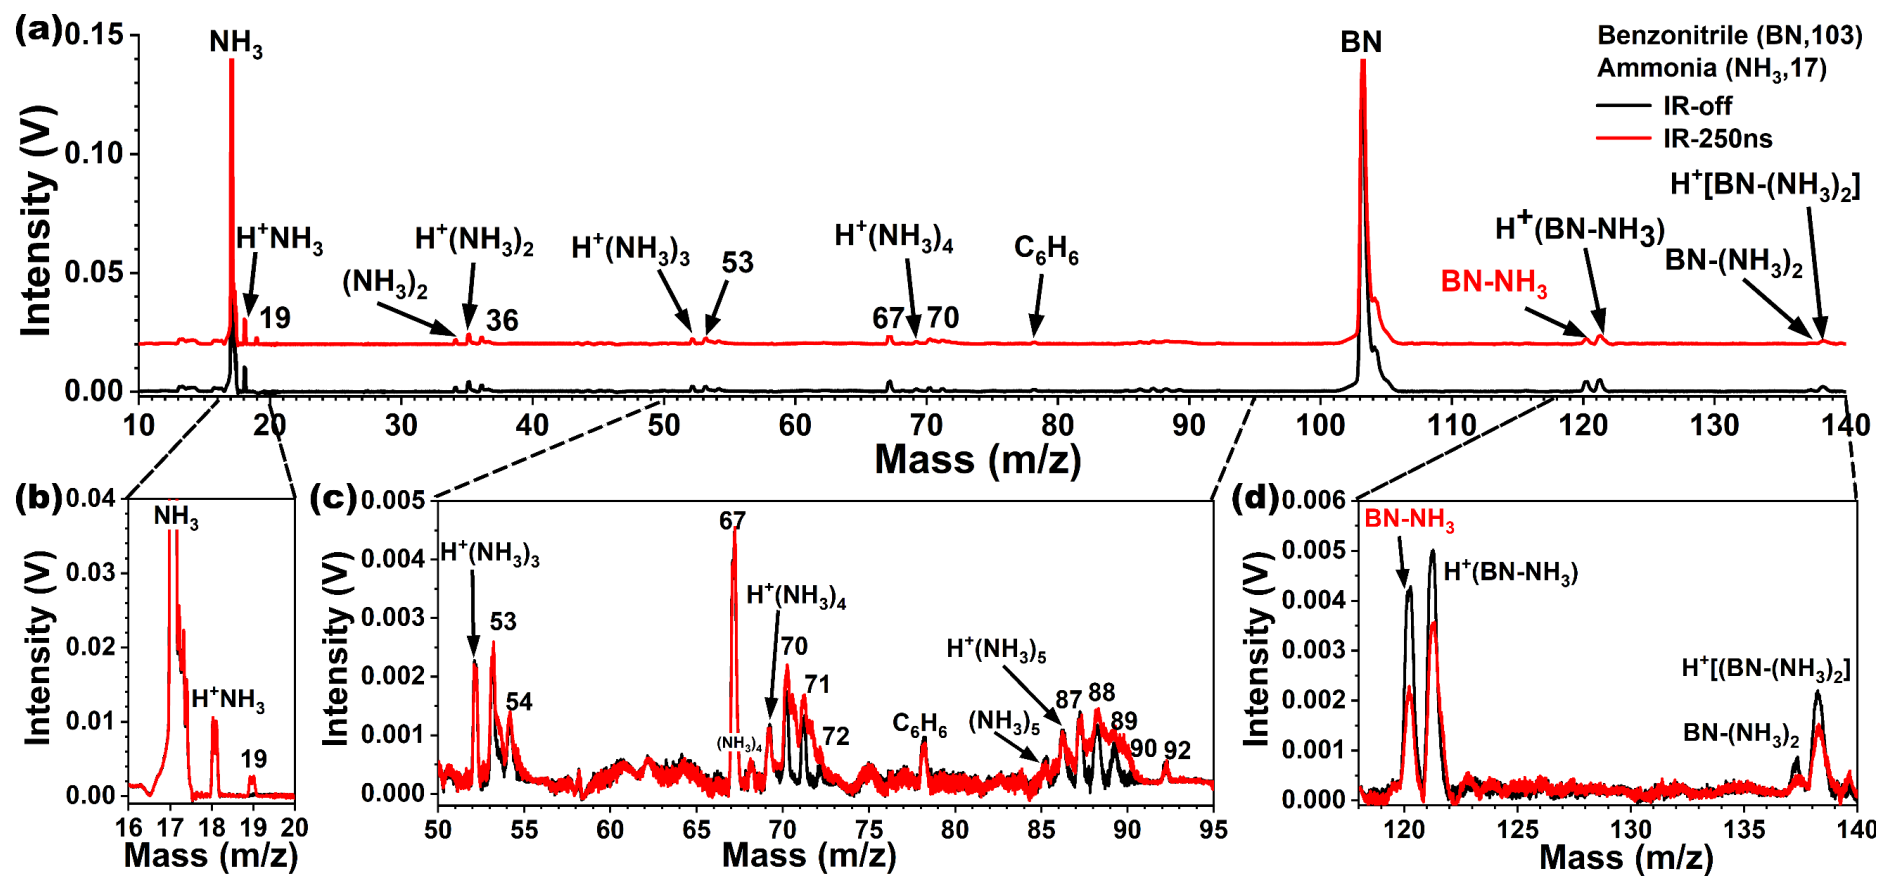

**Fig. S1** (a-d) Mass spectra of the  $\text{BN-NH}_3$  clusters with IR laser off (black curve) and on (red curve). IR laser at  $3324\text{ cm}^{-1}$  is introduced 250 ns after the VUV ionization, when measure the mass spectra of the  $\text{BN-NH}_3$ .

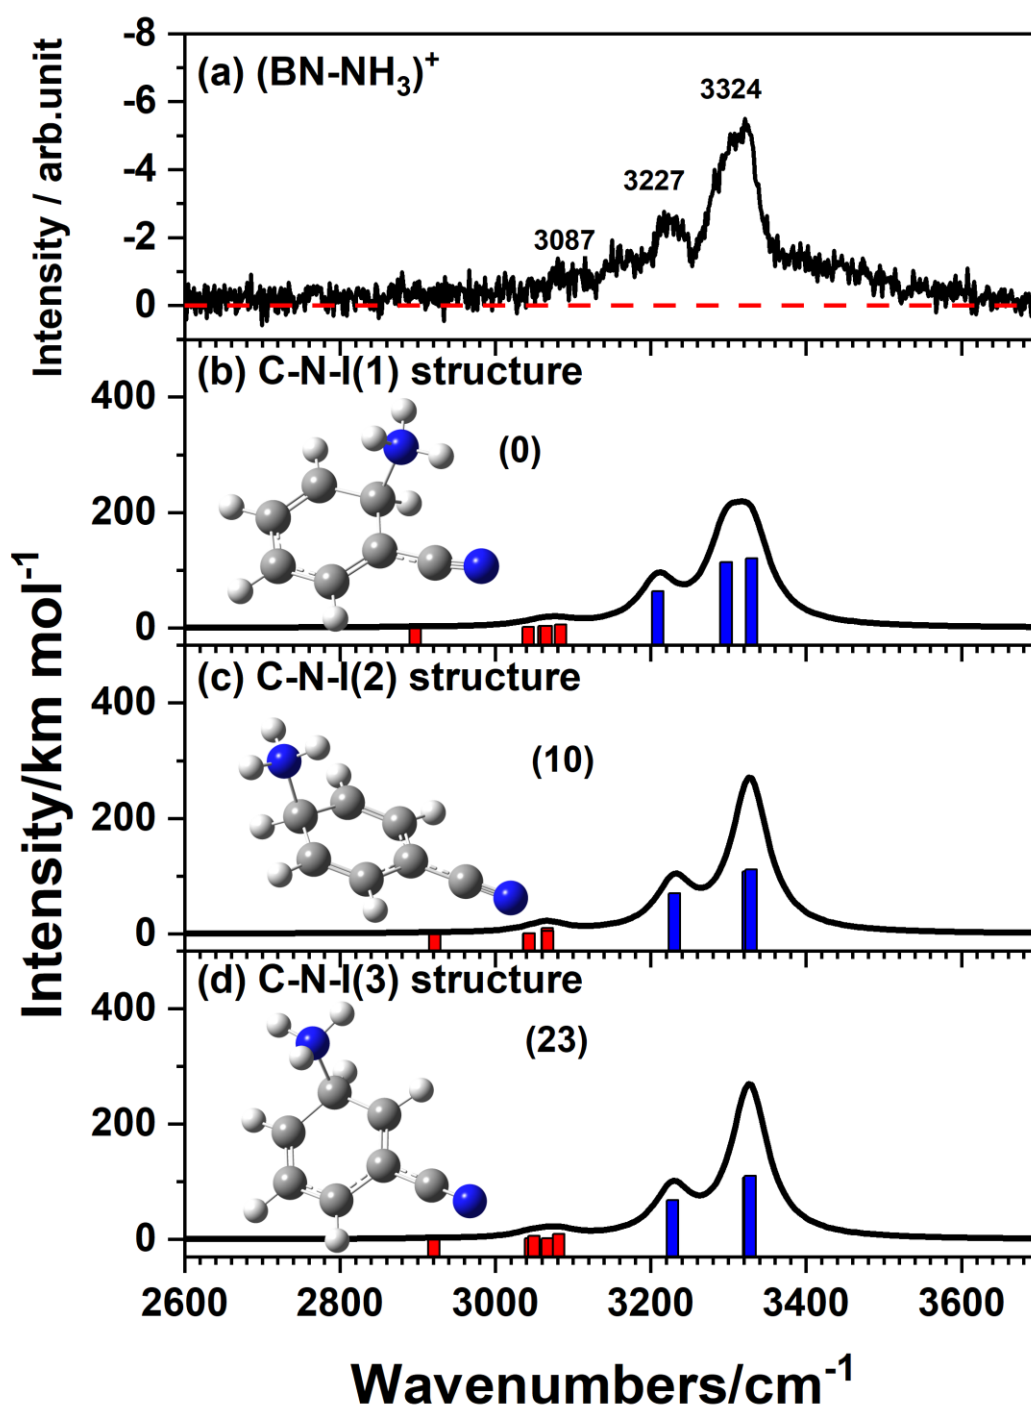

**Fig. S2** (a) The observed spectrum of the cationic BN-NH<sub>3</sub> and (b-d) the computed spectra of C-N-I type structures. Calculated spectra of the three stable C-N-I type structures of (BN-NH<sub>3</sub>)<sup>+</sup> were optimized under the method of M06-2X-D3/6-311++G(d,p) with a scaling factor of 0.950, and the resulting stick spectra were convoluted by a Lorentzian line shape function with a width of 30 cm<sup>-1</sup> (fwhm). The predicted structures and relative energy at the zero point vibrational level (the number in parentheses in kJ mol<sup>-1</sup>) of the cluster are also shown. The red and blue sticks represent the CH vibration modes and NH vibration modes, respectively.

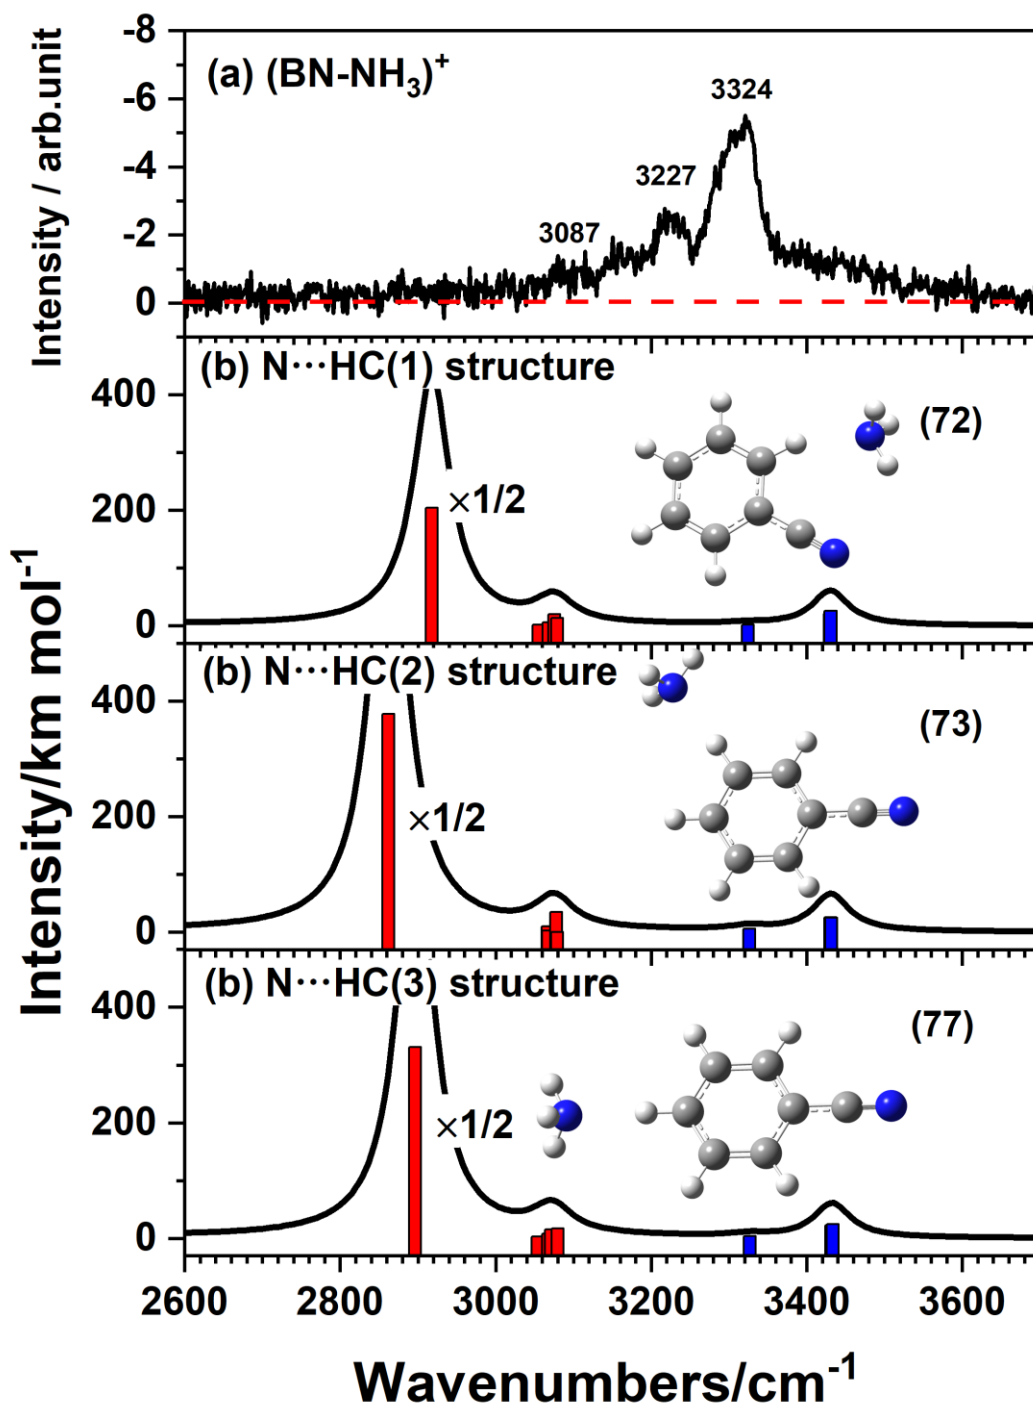

**Fig. S3** (a) The observed spectrum of the cationic  $\text{BN-NH}_3$  and (b-d) the computed spectra of  $\text{N}\cdots\text{HC}$  type structures. Calculated spectra of the three stable  $\text{N}\cdots\text{HC}$  type structures of  $(\text{BN-NH}_3)^+$  were optimized under the method of M06-2X-D3/6-311++G(d,p) with a scaling factor of 0.950, and the resulting stick spectra were convoluted by a Lorentzian line shape function with a width of  $30 \text{ cm}^{-1}$  (fwhm). The predicted structures and relative energy at the zero point vibrational level (the number in parentheses in  $\text{kJ mol}^{-1}$ ) of the cluster are also shown. The red and blue sticks represent the CH vibration modes and NH vibration modes, respectively.

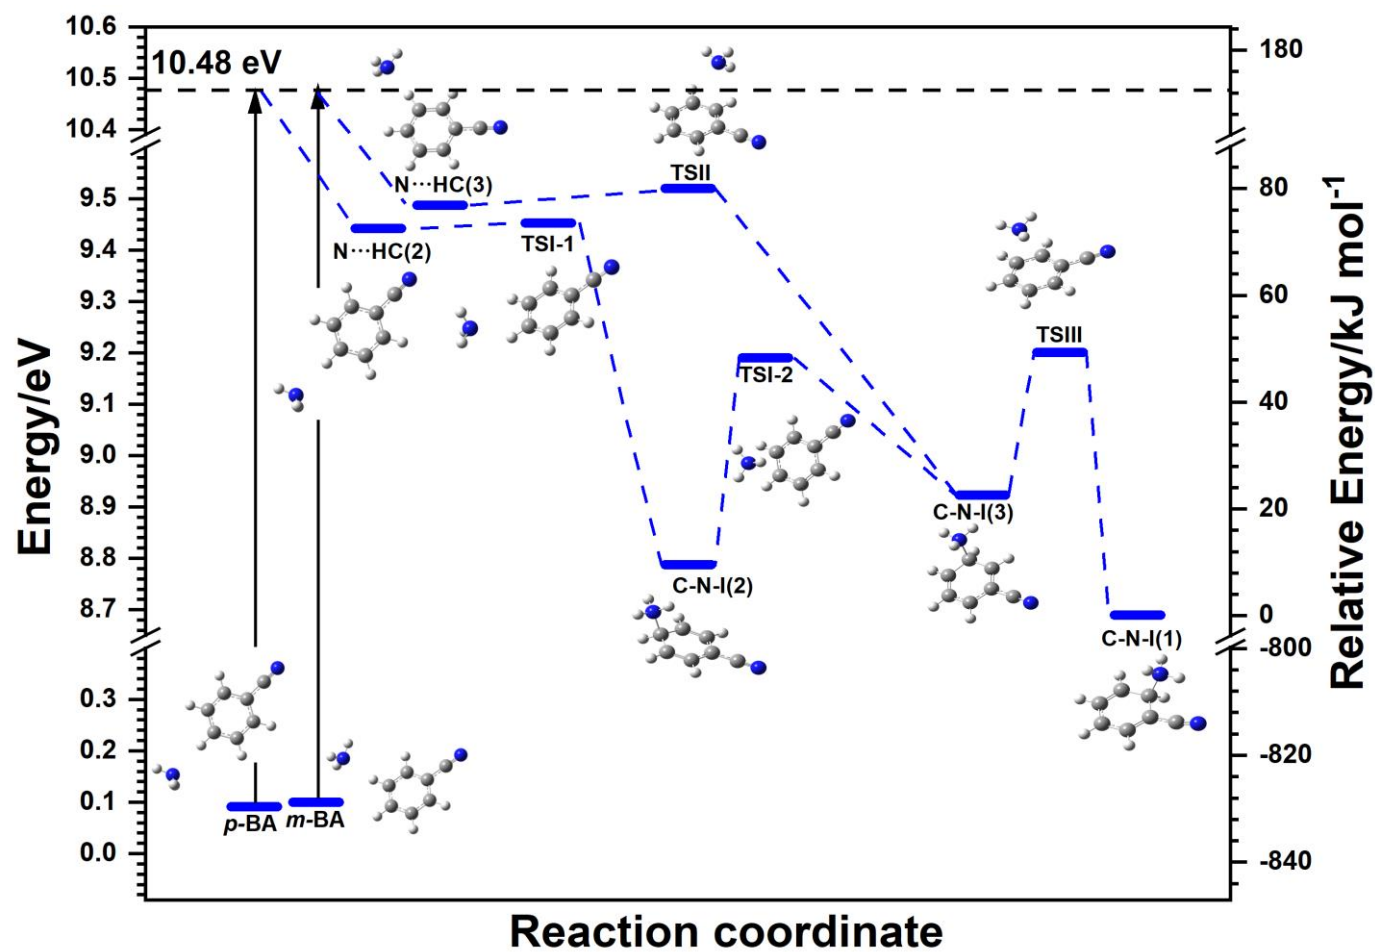

**Fig. S4** Energy diagram for the isomerization reaction of  $(\text{BN-NH}_3)^+$  after ionization from stable neutral  $m\text{-BA}$  and  $p\text{-BA}$  structures, The energies in the diagram were calculated at the M06-2X-D3/6-311++G(d,p) level. The relative energy of C-N-I(1) is set to 0  $\text{kJ mol}^{-1}$  as the reference point.

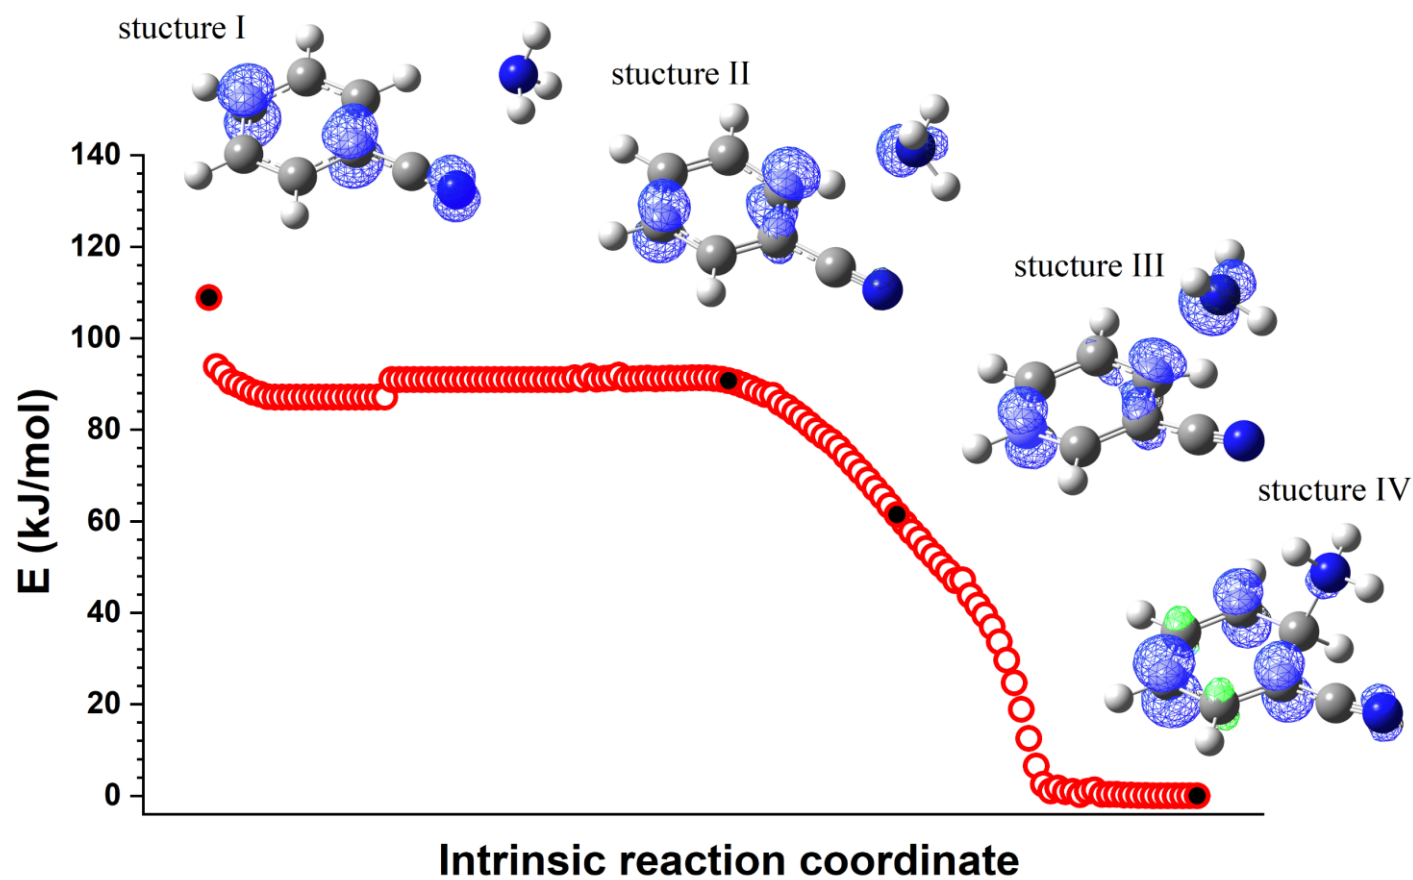

**Fig. S5** The potential energy curves along the intrinsic reaction coordinate (IRC) of vertically ionized C-N-I type structure of  $(\text{BN-NH}_3)^+$ . The geometries of C-N-I(1) structure is same as that in Fig. 2(b). The spin density plots (isoval= 0.01) of the vertically ionized and stable structures are also shown in the figure. The blue and green grids represent positive and negative spin density, respectively. The charge distribution at the black marks is depicted in the vicinity spin density plot.

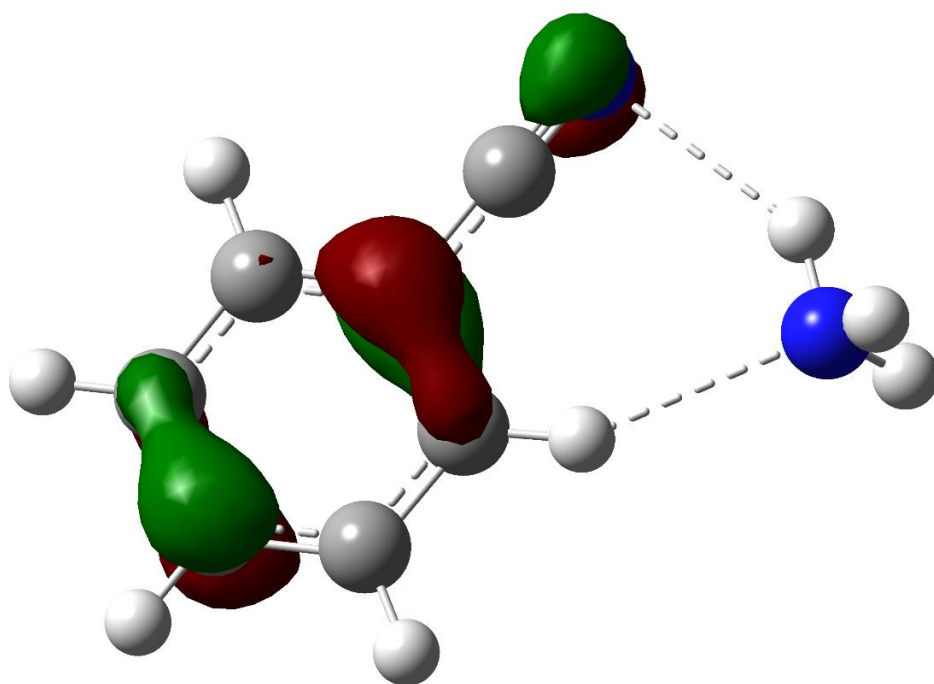

**Fig. S6** The HOMO orbitals (isoval= 0.08) of BN-NH<sub>3</sub> optimized under the method of M06-2X-D3/6-311++G(d,p) .



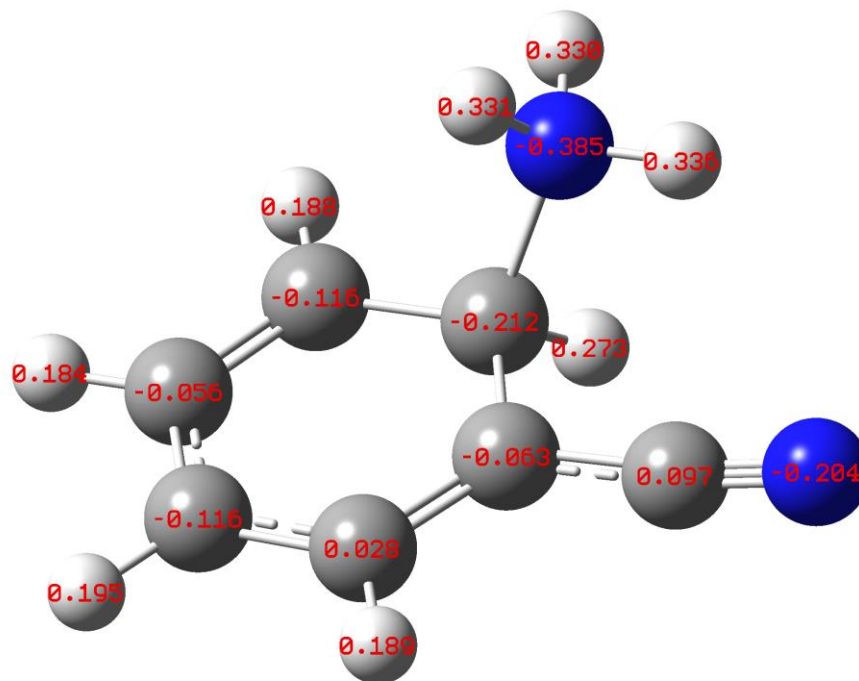

**Fig. S7** The Mulliken charge distribution for the C-N-I type structure of (BN-NH<sub>3</sub>)<sup>+</sup>. The geometries of C-N-I(1) structure is same as that in Fig. 2(b). Charge Distribution (the numerical unit on atoms is in a.u.) were optimized under the method of M06-2X-D3/6-311++G(d,p).

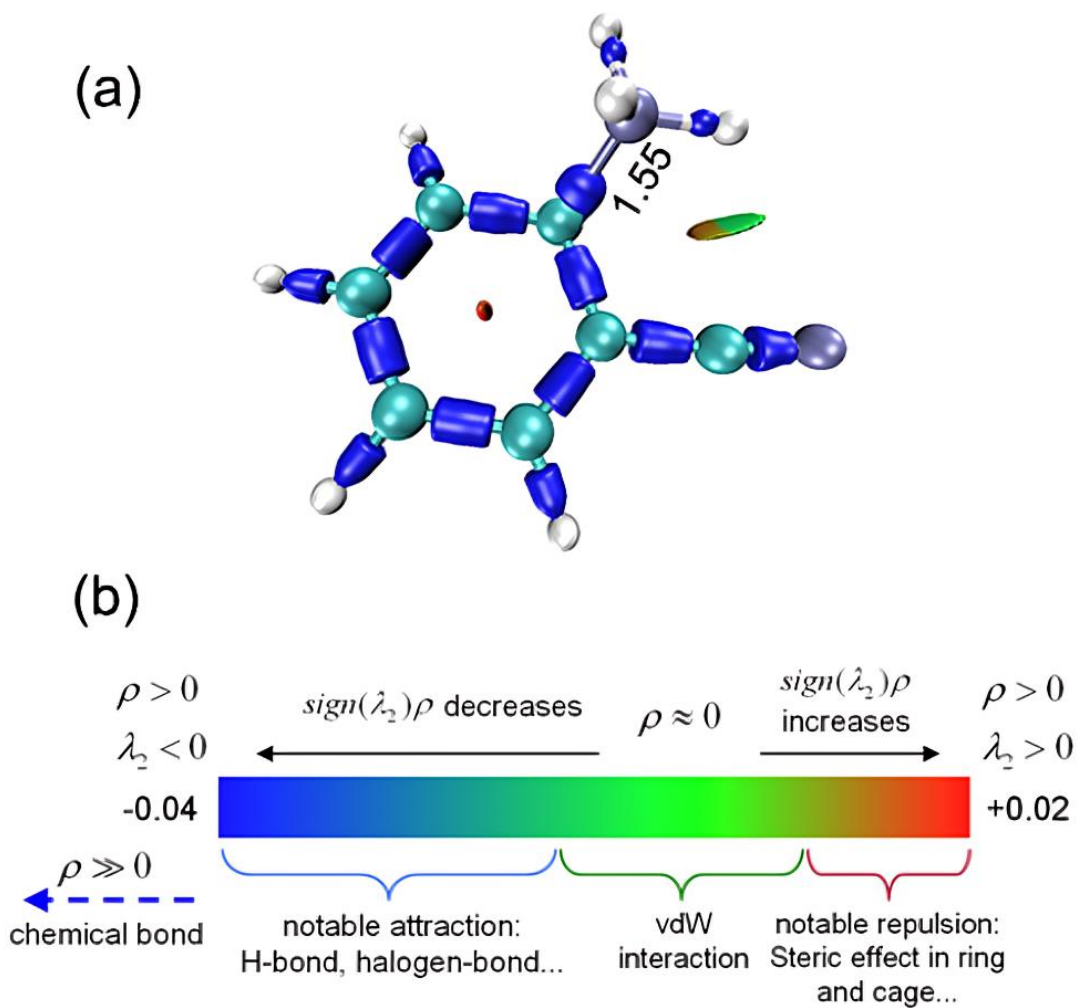

**Fig. S8** (a) Isosurface map (Isovalue=1.0) of C-N-I(1) structure for  $(\text{BN-NH}_3)^+$ . (b) The coloring method for mapping the  $\text{sign}(\lambda_2)\rho$  onto the isosurface. Similar to RDG analysis, the  $\text{sign}(\lambda_2)\rho$  function differentiates the strength and characteristics of distinct regions by projecting them with various colors onto the isosurface of IRI. Here,  $\text{sign}(\lambda_2)$  represents the second largest eigenvalue ( $\lambda_2$ ) of the electron density ( $\rho$ ) Hessian matrix and can be utilized to distinguish attractive and repulsive interactions.

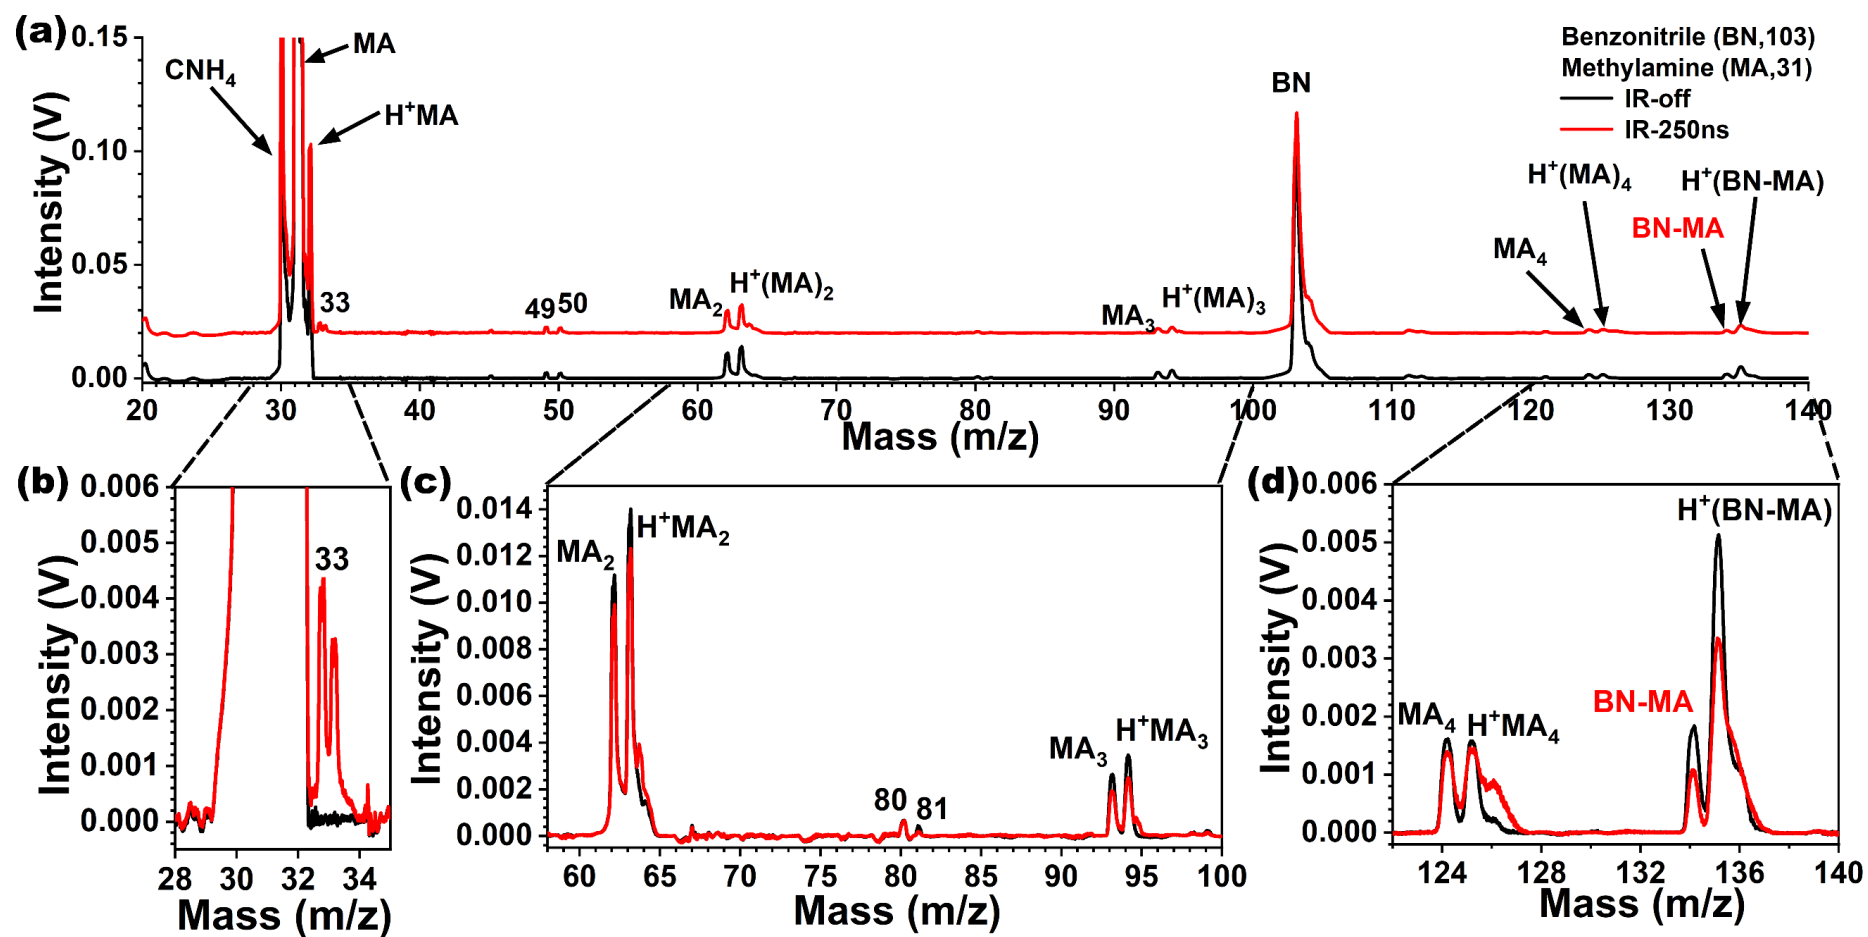

**Fig. S9** (a-d) Mass spectra of the BN-MA clusters with IR laser off (black curve) and on (red curve). IR laser at  $3374\text{ cm}^{-1}$  is introduced 250 ns after the VUV ionization, when measure the mass spectra of the BN-MA.

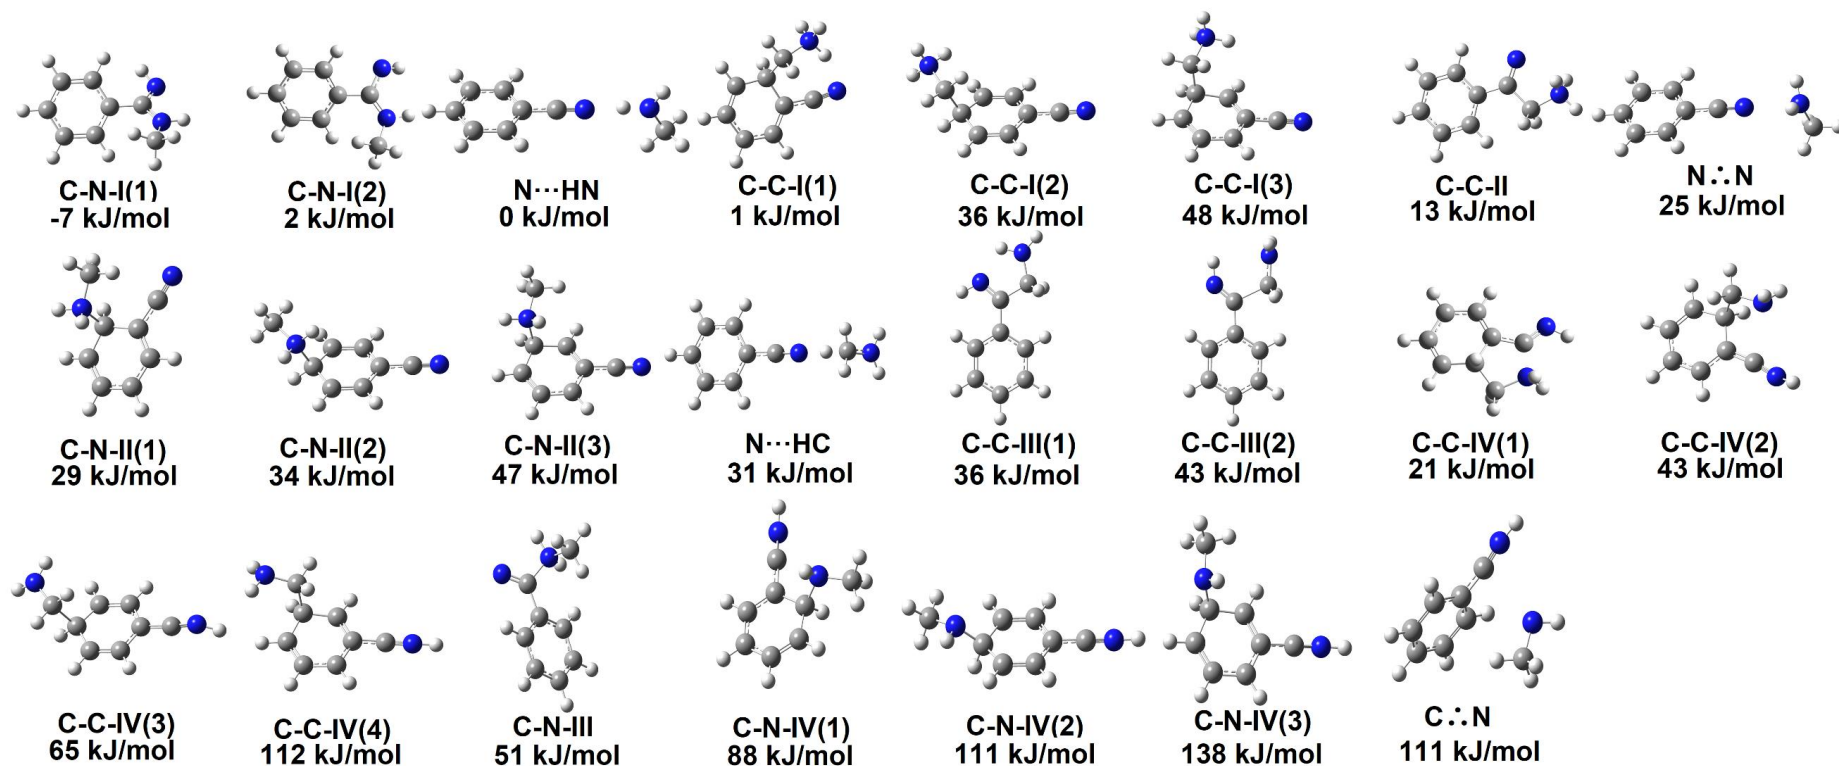

**Fig. S10** Twenty-three isomers of  $(\text{BN-MA})^+$  have been found and divided into twelve categories according to their structural characteristics. Geometric and relative of twenty-three structures of  $(\text{BN-MA})^+$  predicted at M06-2X-D3/6-311++G(d,p) level. The structure categories and their relative zero-point energies are labeled below each structure.

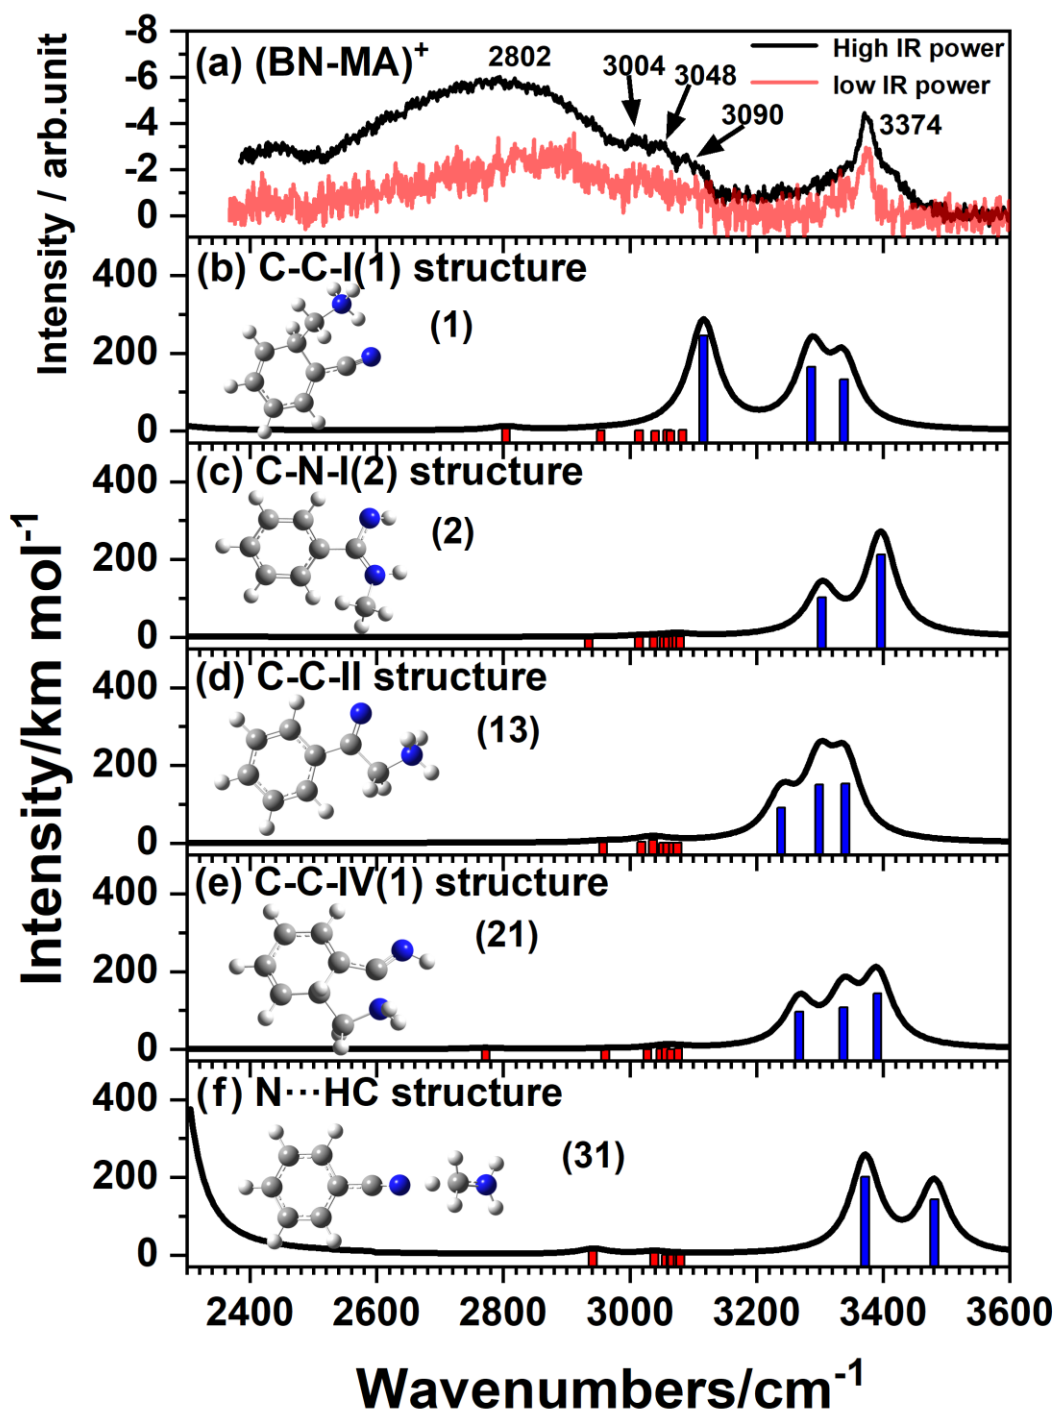

**Fig. S11** (a) The other types of structures of  $(\text{BN-MA})^+$  and (b-f) the corresponding calculated spectra I. Calculated spectra were optimized under the method of M06-2X-D3/6-311++G(d,p) with a scaling factor of 0.950, and the resulting stick spectra were convoluted by a Lorentzian line shape function with a width of  $30 \text{ cm}^{-1}$  (fwhm). The predicted structures and relative energy at the zero point vibrational level (the number in parentheses in  $\text{kJ mol}^{-1}$ ) of the cluster are also shown. The red and blue sticks represent the CH vibration modes and NH vibration modes, respectively.

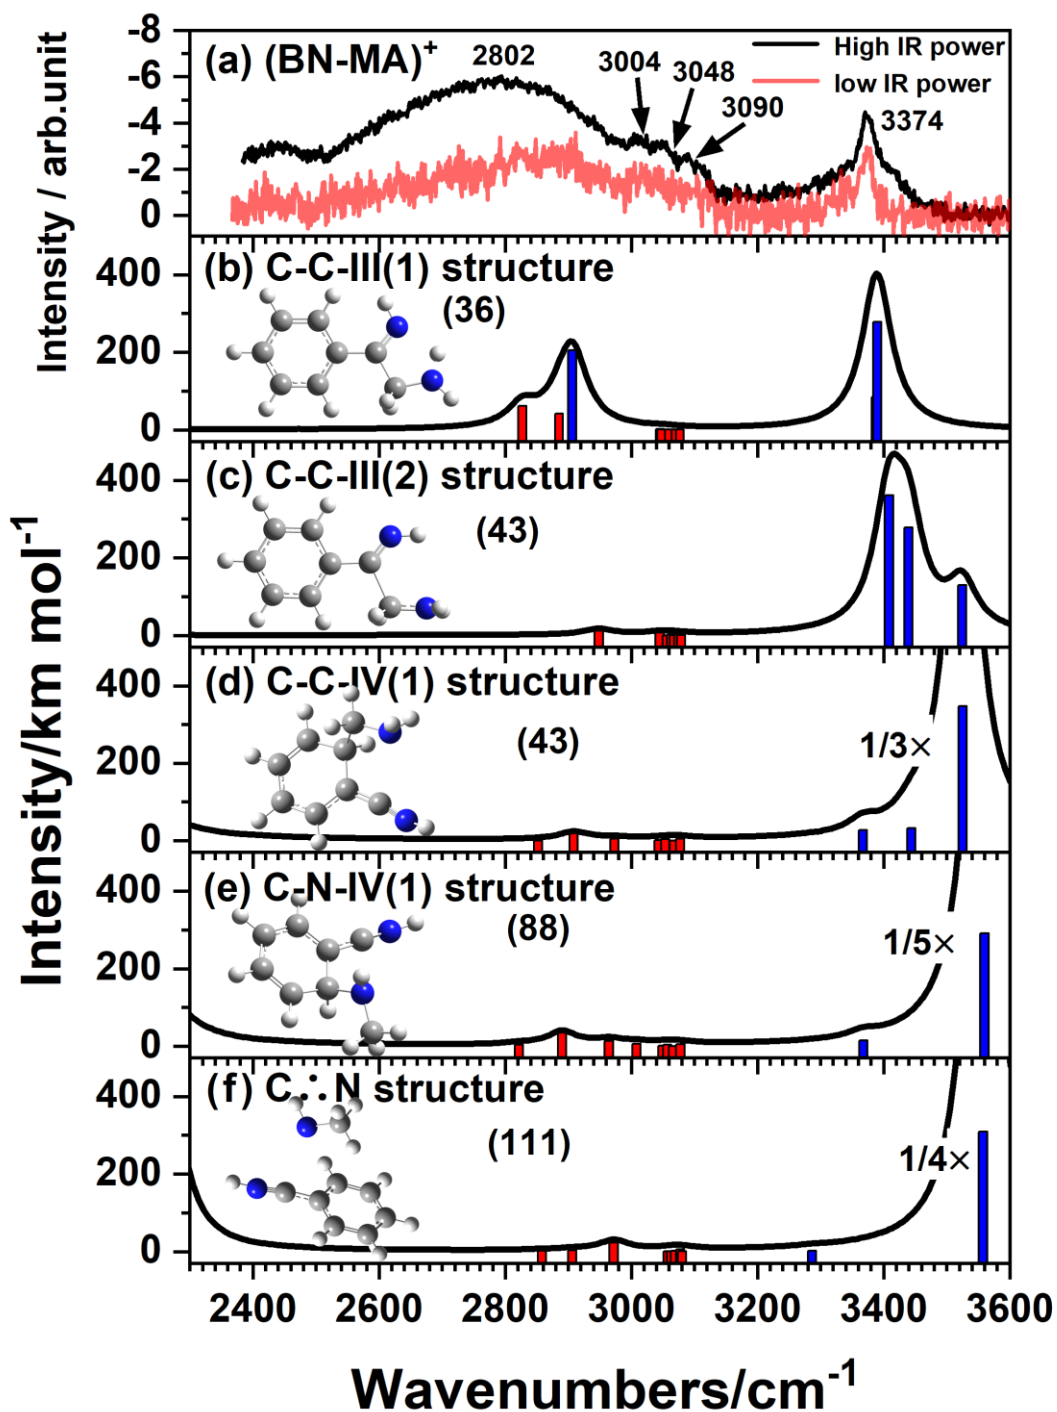

**Fig. S12** (a) The other types of structures of  $(\text{BN-MA})^+$  and (b-f) the corresponding calculated spectra II. Calculated spectra were optimized under the method of M06-2X-D3/6-311++G(d,p) with a scaling factor of 0.950, and the resulting stick spectra were convoluted by a Lorentzian line shape function with a width of 30  $\text{cm}^{-1}$  (fwhm). The predicted structures and relative energy at the zero point vibrational level (the number in parentheses in  $\text{kJ mol}^{-1}$ ) of the cluster are also shown. The red and blue sticks represent the CH vibration modes and NH vibration modes, respectively.

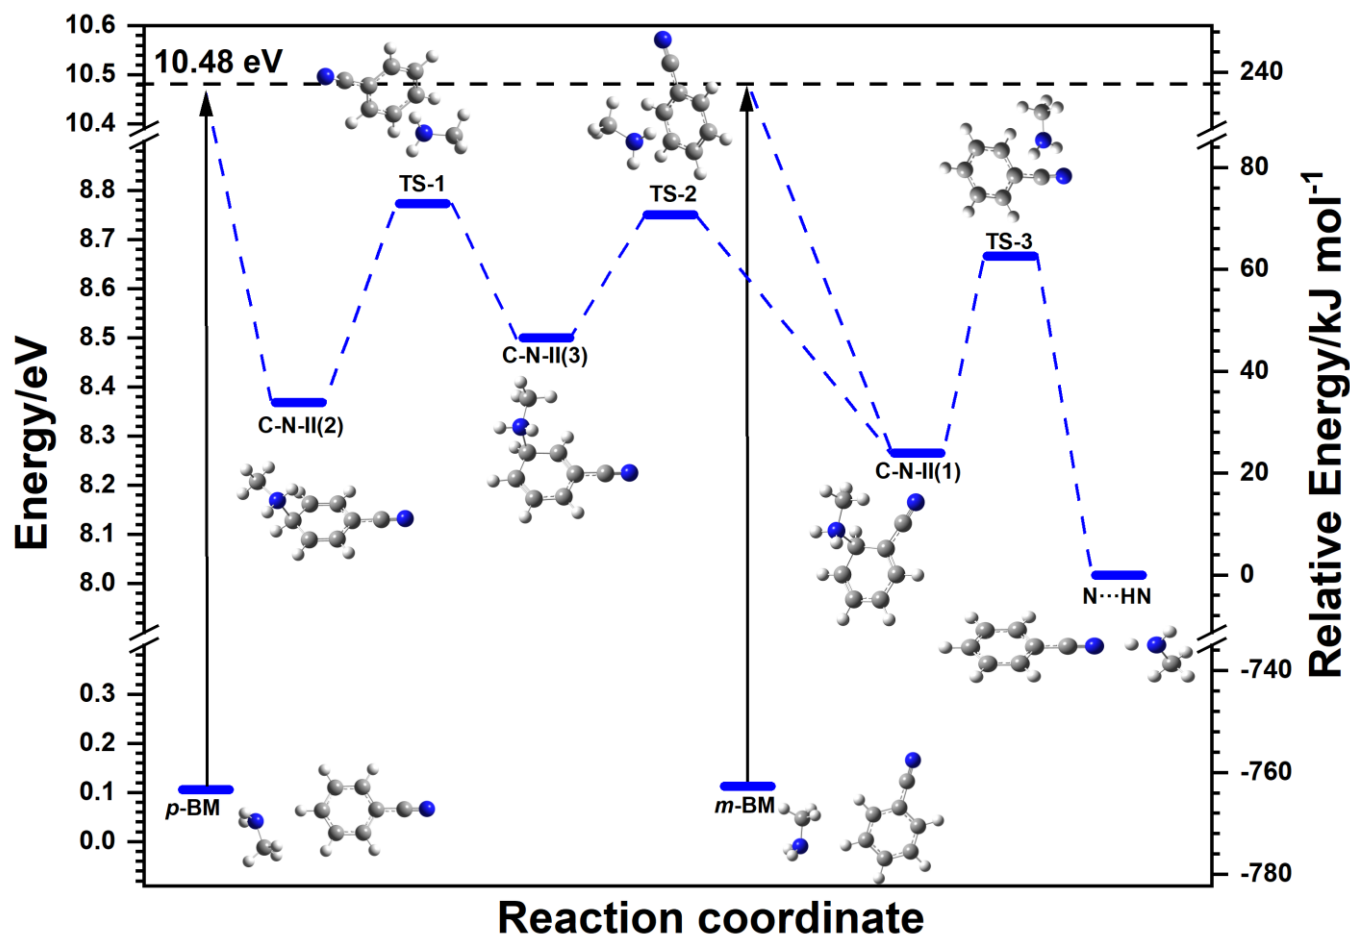

**Fig. S13** Energy diagram for the isomerization reaction of  $(\text{BN-MA})^+$  after ionization from stable neutral  $m\text{-BA}$  and  $p\text{-BA}$  structures, The energies in the diagram were calculated at the M06-2X-D3/6-311++G(d,p) level. The relative energy of  $\text{N}\cdots\text{HN}$  is set to  $0 \text{ kJ mol}^{-1}$  as the reference point.

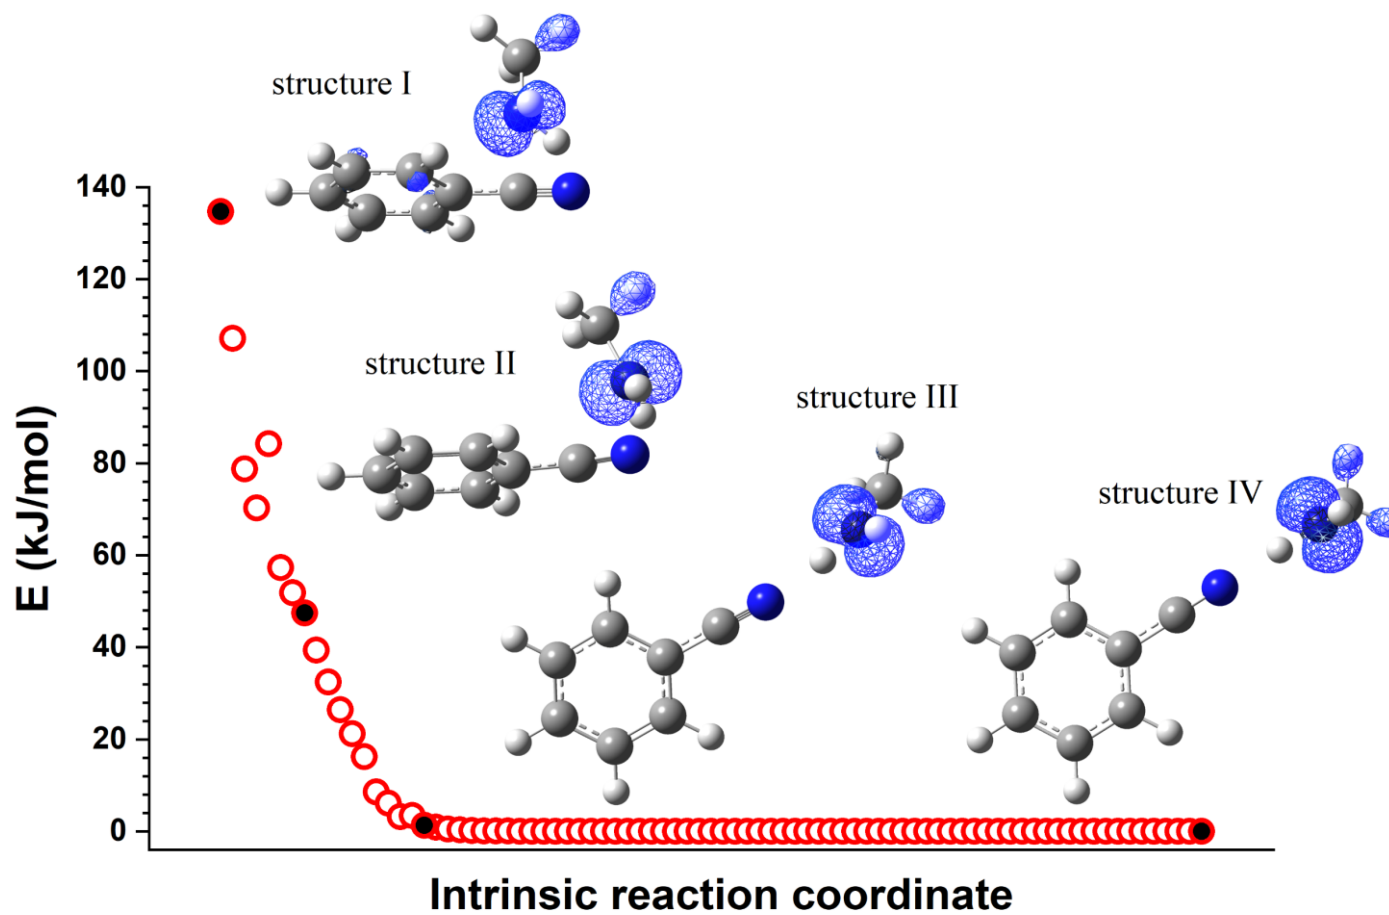

**Fig. S14** The potential energy curves along the intrinsic reaction coordinate (IRC) of vertically ionized N...HN type structure of (BN-MA)<sup>+</sup>. The geometries of N...HN structure is same as that in Fig. 4(c). The spin density plots (isoval= 0.01) of the vertically ionized and stable structures are also shown in the figure. The blue and green grids represent positive and negative spin density, respectively. The charge distribution at the black marks is depicted in the vicinity spin density plot.



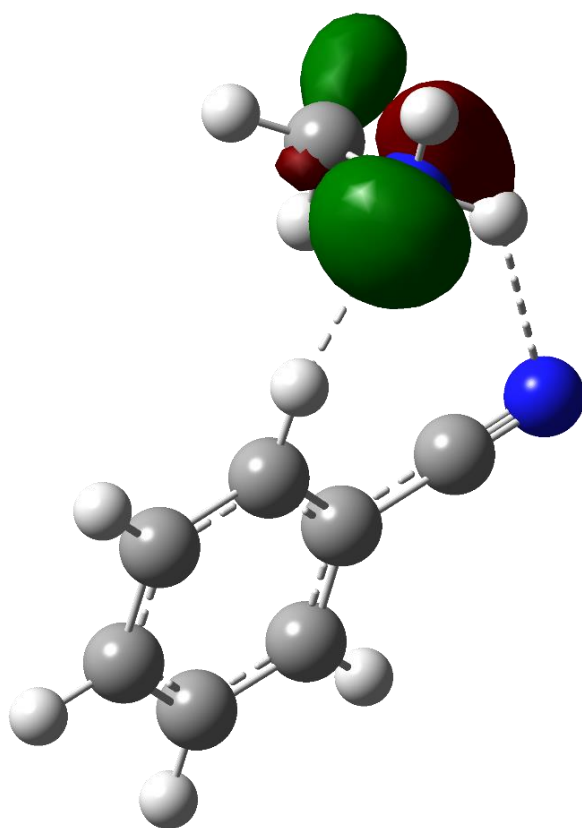

**Fig. S15** The HOMO orbitals (isoval= 0.08) of BN-MA optimized under the method of M06-2X-D3/6-311++G(d,p) .

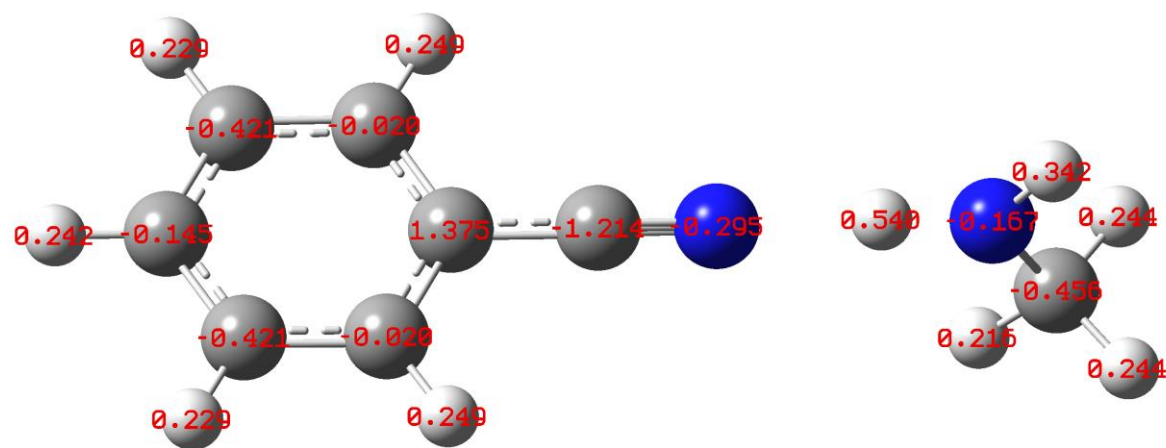

**Fig. S16** The Mulliken charge distribution for the N...HN type structure of (BN-MA)<sup>+</sup>. The geometries of N...HN structure is same as that in Fig. 4(c). Charge Distribution (the numerical unit on atoms is in a.u.) were optimized under the method of M06-2X-D3/6-311++G(d,p).

**Table S1** Calculated harmonic vibrational wavenumbers and IR intensities of BN-NH<sub>3</sub>.

| Experiment                | Calculation <sup>a</sup>              | Assignments                         |
|---------------------------|---------------------------------------|-------------------------------------|
| Bands (cm <sup>-1</sup> ) | <b>o-BA</b>                           | Modes                               |
| 3422                      | 3459(11.0) <sup>b</sup><br>3446(31.0) | anti-sym $\nu_{\text{NH}}$          |
| 3324                      | 3332(8.5)                             | sym $\nu_{\text{NH}}$               |
| 3115                      | 3072(5.6)                             | sym $\nu_{\text{CH}}$               |
| 3098                      | 3064(7.2)                             | anti-sym $\nu_{\text{CH}}$          |
| 3075                      | 3030(55.7)                            | anti-sym $\nu_{\text{CH}}$ (H-bond) |
| 3044                      |                                       |                                     |
| 3010                      | 2983(1.1) <sup>c</sup>                | overtone of bend $\nu_{\text{CH}}$  |

**Note.** <sup>a</sup> calculated by M06-2X-D3/6-311++G(d,p), harmonic vibrational wavenumbers are scaled by the factor of 0.95. <sup>b</sup> value in the parentheses is IR intensity in km mol<sup>-1</sup>. <sup>c</sup> anharmonic vibrational wavenumbers and IR intensities.

**Table S2** Mullikan charge in the BN moiety calculated for various (BN-NH<sub>3</sub>)<sup>+</sup>

| Methods                        | Mullikan charge<br>in the BN moiety |
|--------------------------------|-------------------------------------|
| M06-2X-D3/6-311++G(d,p)        | 0.116                               |
| B3LYP-D3(BJ) /6-311++G(d,p)    | 0.135                               |
| CAM-B3LYP-D3(BJ)/6-311++g(d,p) | 0.145                               |
| WB97XD/6-311++g(d,p)           | 0.087                               |
| MP2/6-311++g(d,p)              | 0.109                               |

**Table S3** Calculated harmonic vibrational wavenumbers and IR intensities of BN-MA.

| Experiment                | Calculation <sup>a</sup> | Assignments                           |
|---------------------------|--------------------------|---------------------------------------|
| Bands (cm <sup>-1</sup> ) | <b>o-BM</b>              | Modes                                 |
| 3409                      | 3442(12.3) <sup>b</sup>  | anti-sym $\nu_{\text{NH}}$            |
| 3349                      | 3364(4.4)                | sym $\nu_{\text{NH}}$                 |
| 3100                      | 3065(6.8)                | anti-sym $\nu_{\text{CH}}$ of BN      |
| 3074                      | 3025(53.4)               | anti-sym $\nu_{\text{CH}}$ (H-bond)   |
| 2986                      | 2978(23.0)               | anti-sym $\nu_{\text{CH}}$ of MA      |
| 2959                      | 2949(28.9)               | anti-sym $\nu_{\text{CH}}$ of MA      |
| 2898                      | 2882(59.2)               | sym $\nu_{\text{CH}}$ of MA           |
| 2821                      | 2811(0.9) <sup>c</sup>   | combination of bend $\nu_{\text{CH}}$ |
| 2789                      | 2770(3.5) <sup>c</sup>   | combination of bend $\nu_{\text{CH}}$ |

**Note.** <sup>a</sup> calculated by M06-2X-D3/6-311++G(d,p), harmonic vibrational wavenumbers are scaled by the factor of 0.95. <sup>b</sup> value in the parentheses is IR intensity in km mol<sup>-1</sup>. <sup>c</sup> anharmonic vibrational wavenumbers and IR intensities.
